# Supplementary material for: Synthesis of chiral R/S-pseudopeptide-based Cu(ii) & Zn(ii) complexes for use in targeted delivery for antitumor therapy: enantiomeric discrimination with CT-DNA and pBR322 DNA hydrolytic cleavage mechanism
Source: Royal Society of Chemistry journal article supplement (doi:10.1039/c6ra24770a), 2017-01-01
Supplement: c6ra24770a1.pdf [file c6ra24770a1.pdf]

## Supplementary Information

### Synthesis of chiral R/S- pseudopeptide based Cu(II) & Zn(II) complexes for use in targeted delivery for antitumor therapy: Enantiomeric discrimination with CT-DNA and pBR322 DNA hydrolytic cleavage mechanism.

Sabiha Parveen, Sartaj Tabassum, Farukh Arjmand\*

Department of Chemistry, Aligarh Muslim University, Aligarh 202002, India

\*Corresponding author Tel.: +91 5712703893.

E-mail address: [farukh\\_arjmand@yahoo.co.in](mailto:farukh_arjmand@yahoo.co.in) (F. Arjmand).

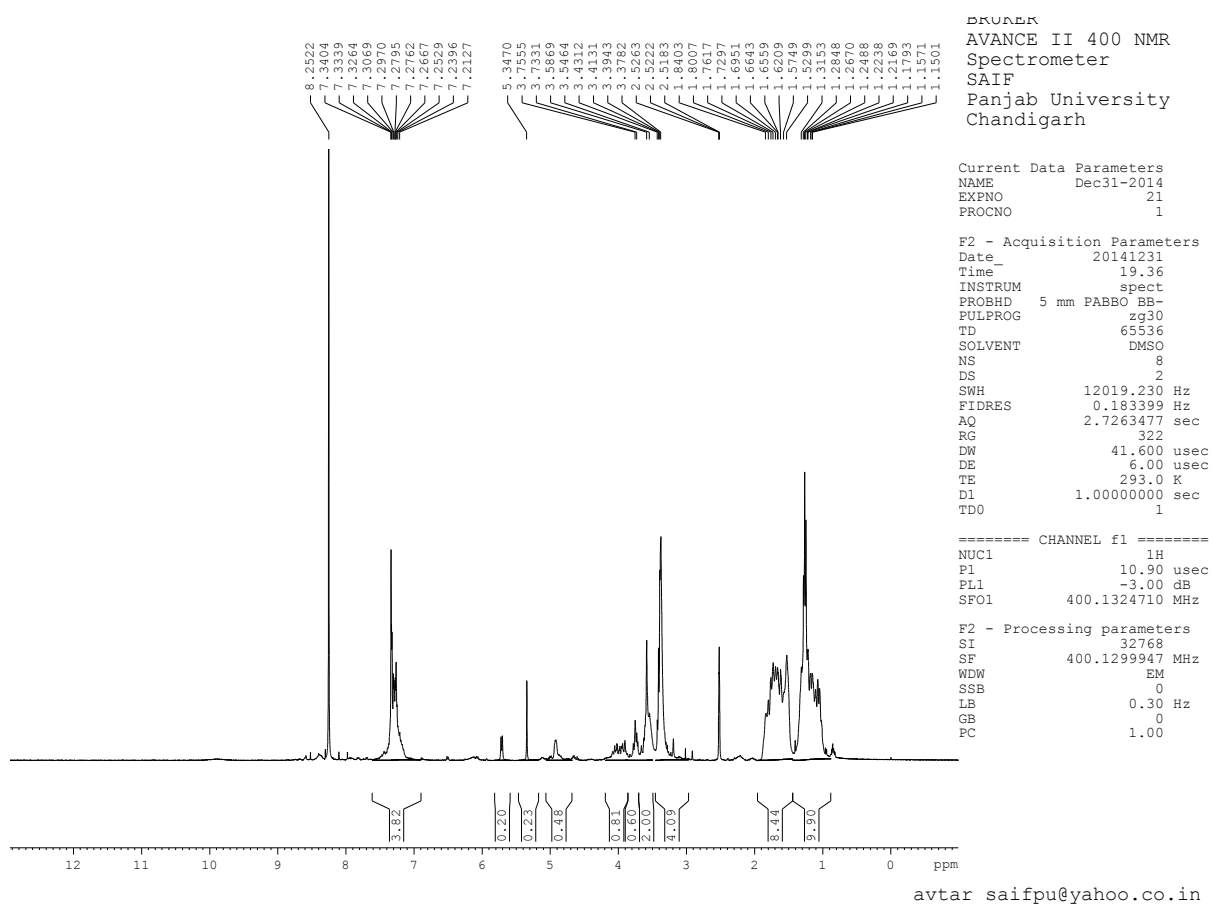

Fig S1. NMR spectra of ligand L.

SF-86

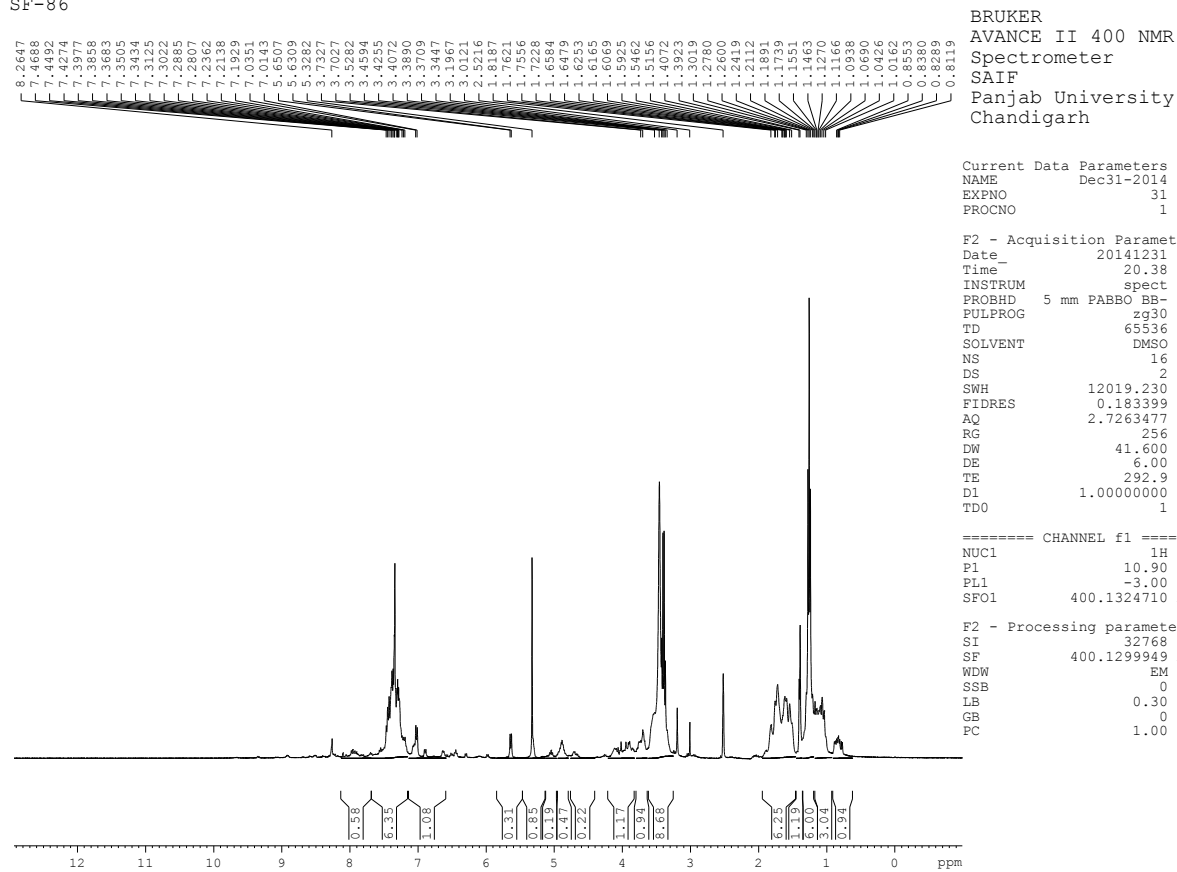

BRUKER  
AVANCE II 400 NMR  
Spectrometer  
SAIF  
Panjab University  
Chandigarh

Current Data Parameters  
NAME Dec31-2014  
EXPNO 31  
PROCNO 1

F2 - Acquisition Parameters  
Date\_ 20141231  
Time 20.38  
INSTRUM spect  
PROBHD 5 mm PABBO BB-  
PULPROG zg30  
TD 65536  
SOLVENT DMSO  
NS 16  
DS 2  
SWH 12019.230 Hz  
FIDRES 0.183399 Hz  
AQ 2.7263477 sec  
RG 256  
DW 41.600 usec  
DE 6.00 usec  
TE 292.9 K  
D1 1.00000000 sec  
TD0 1

===== CHANNEL f1 =====  
NUC1 1H  
P1 10.90 usec  
PL1 -3.00 dB  
SFO1 400.1324710 MHz

F2 - Processing parameters  
SI 32768  
SF 400.1299949 MHz  
WDW EM  
SSB 0  
LB 0.30 Hz  
GB 0  
PC 1.00

avtar\_saiipu@yahoo.co.in

Fig S2. NMR spectra of 2s.

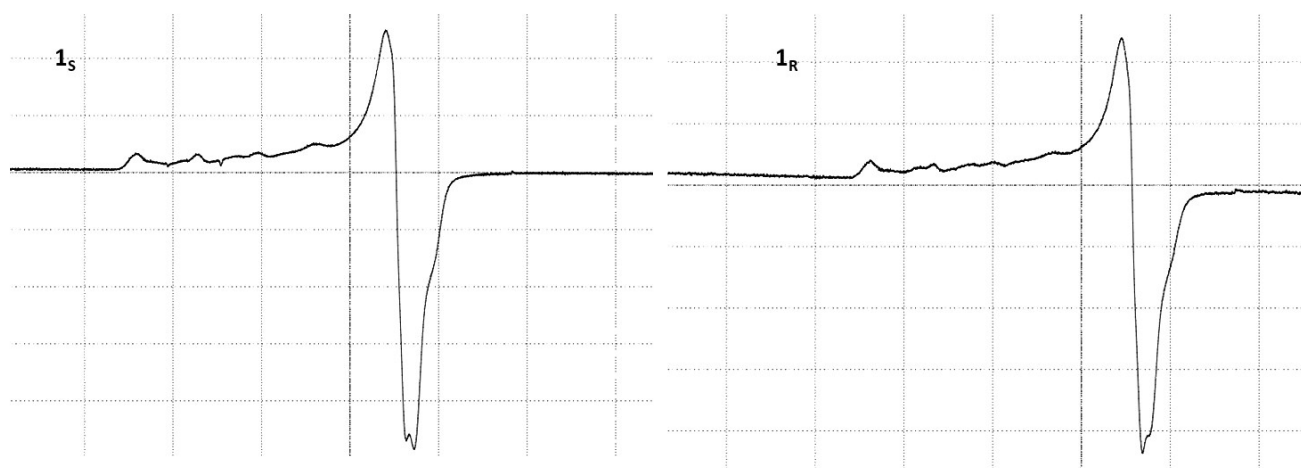

**Fig S3.** EPR spectra of complexes  $1_S$  and  $1_R$ .

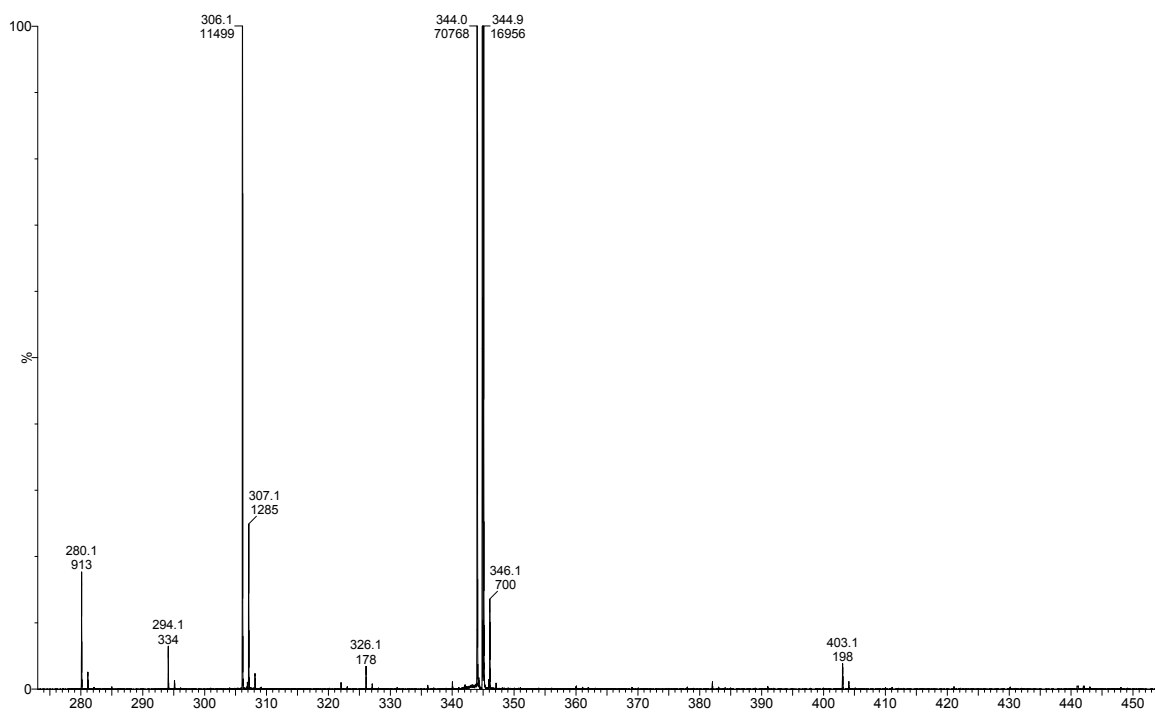

**Fig S4(i)** Mass spectra of ligand L.

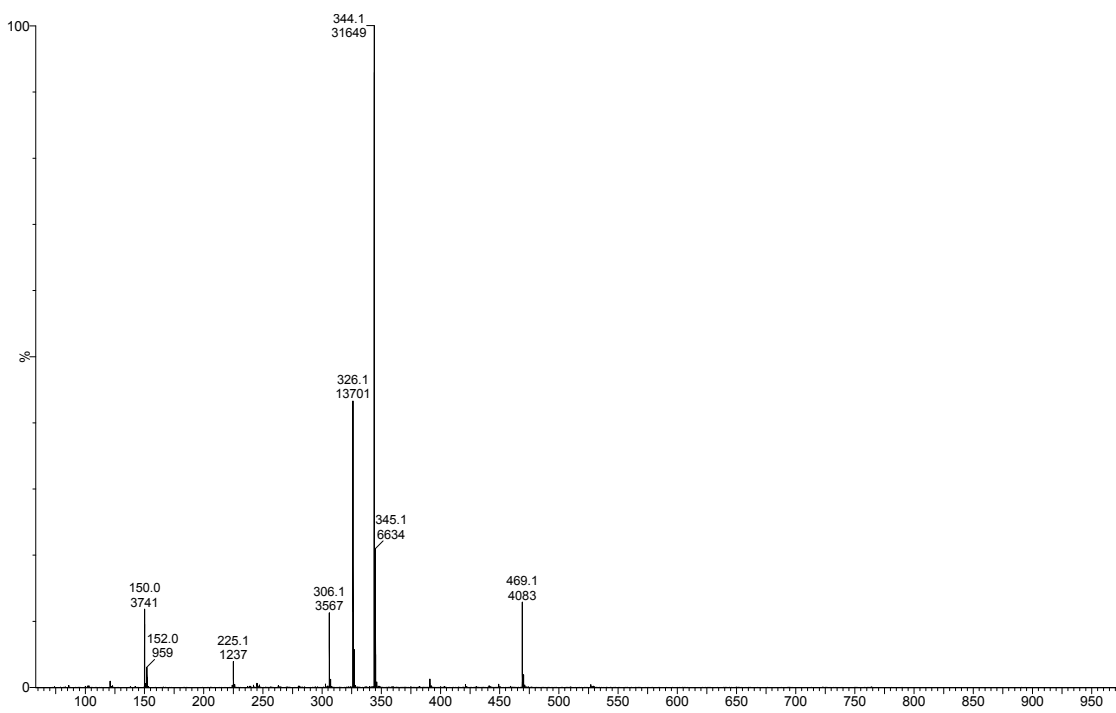

**Fig S4(ii)** Mass spectra of 2s.

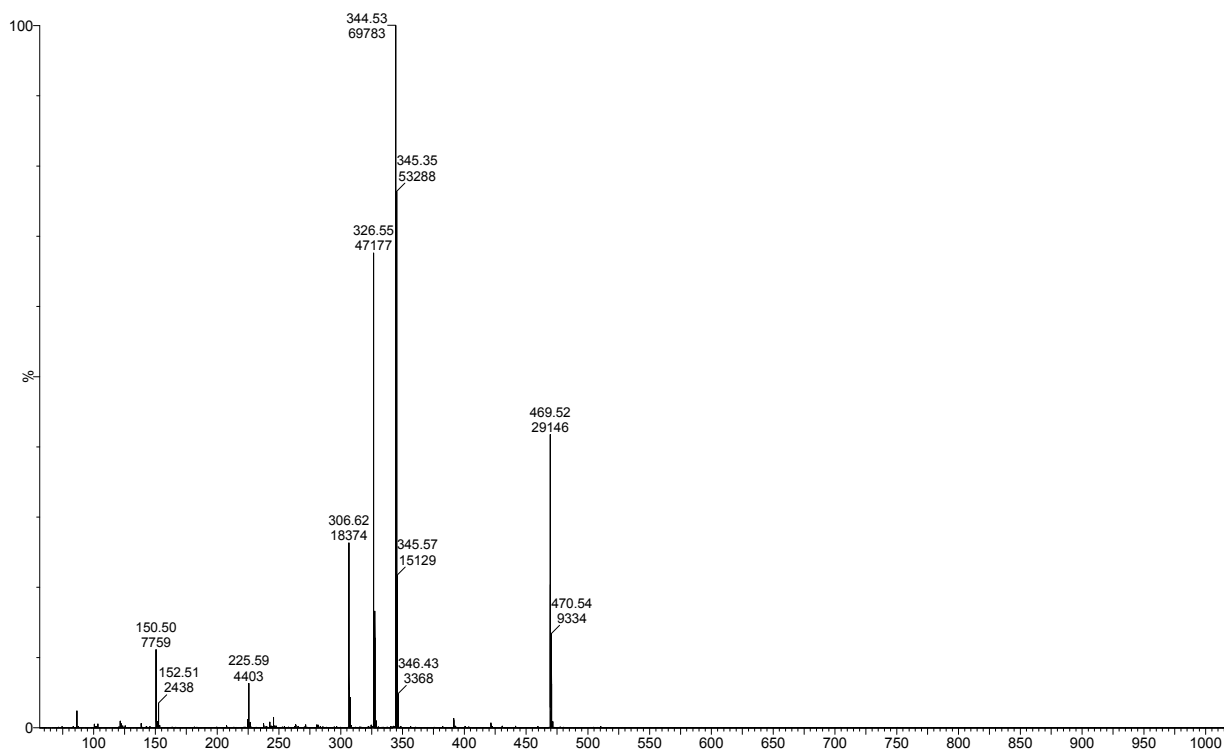

**Fig S4(iii)** Mass spectra of 2<sub>R</sub>.
